# Supplementary material
Source: PubMed Central journal article supplement (PMC11073368)
Supplement: 18_2023_4874_MOESM8_ESM.pdf [file 18_2023_4874_MOESM8_ESM.pdf]

**FIGURE 1:**

| Density of Gephyrin <sup>+</sup> clusters in 1 <sup>st</sup> order dendrites of adult-born DGCs |       |         |       |       |       |
|-------------------------------------------------------------------------------------------------|-------|---------|-------|-------|-------|
| KRUSKAL-WALLIS TEST                                                                             |       |         |       |       |       |
| Fig 1G                                                                                          | df    |         | K     | p     |       |
|                                                                                                 |       | 4 / 140 |       | 76.08 | <.001 |
|                                                                                                 | 1w    | 2w      | 3w    | 4w    | 8w    |
| 1w                                                                                              | --    | 0.72    | <.001 | <.001 | <.001 |
| 2w                                                                                              | >.999 | --      | <.001 | <.001 | 0.003 |
| 3w                                                                                              | <.001 | <.001   | --    | >.999 | >.999 |
| 4w                                                                                              | <.001 | <.001   | >.999 | --    | 0.383 |
| 8w                                                                                              | <.001 | 0.003   | >.999 | 0.383 | --    |

| Density of Gephyrin <sup>+</sup> clusters in 2 <sup>nd</sup> order dendrites of adult-born DGCs |       |         |       |       |       |
|-------------------------------------------------------------------------------------------------|-------|---------|-------|-------|-------|
| KRUSKAL-WALLIS TEST                                                                             |       |         |       |       |       |
| Fig 1G                                                                                          | df    |         | K     | p     |       |
|                                                                                                 |       | 4 / 141 |       | 94.37 | <.001 |
|                                                                                                 | 1w    | 2w      | 3w    | 4w    | 8w    |
| 1w                                                                                              | --    | >.999   | <.001 | <.001 | <.001 |
| 2w                                                                                              | >.999 | --      | <.001 | <.001 | <.001 |
| 3w                                                                                              | <.001 | <.001   | --    | >.999 | >.999 |
| 4w                                                                                              | <.001 | <.001   | >.999 | --    | >.999 |
| 8w                                                                                              | <.001 | <.001   | >.999 | >.999 | --    |

| Density of Gephyrin <sup>+</sup> clusters in 3 <sup>rd</sup> order dendrites of adult-born DGCs |       |         |       |       |       |
|-------------------------------------------------------------------------------------------------|-------|---------|-------|-------|-------|
| KRUSKAL-WALLIS TEST                                                                             |       |         |       |       |       |
| Fig 1G                                                                                          | df    |         | K     | p     |       |
|                                                                                                 |       | 4 / 150 |       | 108.8 | <.001 |
|                                                                                                 | 1w    | 2w      | 3w    | 4w    | 8w    |
| 1w                                                                                              | --    | 0.796   | <.001 | <.001 | <.001 |
| 2w                                                                                              | 0.796 | --      | <.001 | <.001 | <.001 |
| 3w                                                                                              | <.001 | <.001   | --    | >.999 | >.999 |
| 4w                                                                                              | <.001 | <.001   | >.999 | --    | >.999 |
| 8w                                                                                              | <.001 | <.001   | >.999 | >.999 | --    |

| Density of Gephyrin <sup>+</sup> clusters in 4 <sup>th</sup> order dendrites of adult-born DGCs |       |         |       |       |
|-------------------------------------------------------------------------------------------------|-------|---------|-------|-------|
| KRUSKAL-WALLIS TEST                                                                             |       |         |       |       |
| Fig 1G                                                                                          | df    | K       | p     |       |
|                                                                                                 |       | 3 / 123 | 63.73 | <.001 |
|                                                                                                 | 2w    | 3w      | 4w    | 8w    |
| 2w                                                                                              | --    | <.001   | <.001 | <.001 |
| 3w                                                                                              | <.001 | --      | 0.018 | 0.039 |
| 4w                                                                                              | <.001 | 0.018   | --    | >.999 |
| 8w                                                                                              | <.001 | 0.039   | >.999 | --    |

| Density of Gephyrin <sup>+</sup> clusters in 5 <sup>th</sup> order dendrites of adult-born DGCs |       |         |       |       |
|-------------------------------------------------------------------------------------------------|-------|---------|-------|-------|
| KRUSKAL-WALLIS TEST                                                                             |       |         |       |       |
| Fig 1G                                                                                          | df    | K       | p     |       |
|                                                                                                 |       | 3 / 122 | 68.94 | <.001 |
|                                                                                                 | 2w    | 3w      | 4w    | 8w    |
| 2w                                                                                              | --    | <.001   | <.001 | <.001 |
| 3w                                                                                              | <.001 | --      | 0.017 | 0.294 |
| 4w                                                                                              | <.001 | 0.017   | --    | >.999 |
| 8w                                                                                              | <.001 | 0.294   | >.999 | --    |

| Density of Gephyrin <sup>+</sup> clusters in the soma of adult-born DGCs |         |       |       |       |       |
|--------------------------------------------------------------------------|---------|-------|-------|-------|-------|
| KRUSKAL-WALLIS TEST                                                      |         |       |       |       |       |
| Fig 1H                                                                   | df      |       | K     | p     |       |
|                                                                          | 4 / 155 |       | 41.2  | <.001 |       |
|                                                                          | 1w      | 2w    | 3w    | 4w    | 8w    |
| 1w                                                                       | --      | >.999 | <.001 | <.001 | 0.021 |
| 2w                                                                       | >.999   | --    | 0.002 | <.001 | 0.129 |
| 3w                                                                       | <.001   | 0.002 | --    | >.999 | >.999 |
| 4w                                                                       | <.001   | <.001 | >.999 | --    | 0.426 |
| 8w                                                                       | 0.021   | 0.129 | >.999 | 0.426 | --    |

| Density of Gephyrin <sup>+</sup> clusters in the axon of adult-born DGCs |         |       |       |       |       |
|--------------------------------------------------------------------------|---------|-------|-------|-------|-------|
| KRUSKAL-WALLIS TEST                                                      |         |       |       |       |       |
| Fig 1I                                                                   | df      |       | K     | p     |       |
|                                                                          | 4 / 146 |       | 75.53 | <.001 |       |
|                                                                          | 1w      | 2w    | 3w    | 4w    | 8w    |
| 1w                                                                       | --      | >.999 | <.001 | <.001 | <.001 |
| 2w                                                                       | >.999   | --    | 0.001 | <.001 | <.001 |
| 3w                                                                       | <.001   | 0.001 | --    | 0.014 | >.999 |
| 4w                                                                       | <.001   | <.001 | 0.014 | --    | 0.084 |
| 8w                                                                       | <.001   | <.001 | >.999 | 0.084 | --    |

| Area of Gephyrin <sup>+</sup> clusters in 1 <sup>st</sup> order dendrites of adult-born DGCs |        |       |       |       |       |
|----------------------------------------------------------------------------------------------|--------|-------|-------|-------|-------|
| KRUSKAL-WALLIS TEST                                                                          |        |       |       |       |       |
| Fig 1J                                                                                       | df     |       | K     | p     |       |
|                                                                                              | 4 / 85 |       | 27.25 | <.001 |       |
|                                                                                              | 1w     | 2w    | 3w    | 4w    | 8w    |
| 1w                                                                                           | --     | >.999 | 0.512 | >.999 | >.999 |
| 2w                                                                                           | >.999  | --    | <.001 | 0.364 | 0.88  |
| 3w                                                                                           | 0.512  | <.001 | --    | 0.005 | 0.01  |
| 4w                                                                                           | >.999  | 0.364 | 0.005 | --    | >.999 |
| 8w                                                                                           | >.999  | 0.88  | 0.01  | >.999 | --    |

| Area of Gephyrin <sup>+</sup> clusters in 2 <sup>nd</sup> order dendrites of adult-born DGCs |        |       |       |       |       |
|----------------------------------------------------------------------------------------------|--------|-------|-------|-------|-------|
| KRUSKAL-WALLIS TEST                                                                          |        |       |       |       |       |
| Fig 1J                                                                                       | df     |       | F     | p     |       |
|                                                                                              | 4 / 95 |       | 35.95 | <.001 |       |
|                                                                                              | 1w     | 2w    | 3w    | 4w    | 8w    |
| 1w                                                                                           | --     | >.999 | 0.033 | >.999 | 0.503 |
| 2w                                                                                           | >.999  | --    | <.001 | >.999 | 0.069 |
| 3w                                                                                           | 0.033  | <.001 | --    | <.001 | 0.347 |
| 4w                                                                                           | >.999  | >.999 | <.001 | --    | 0.1   |
| 8w                                                                                           | 0.503  | 0.069 | 0.347 | 0.1   | --    |

| Area of Gephyrin <sup>+</sup> clusters in 3 <sup>rd</sup> order dendrites of adult-born DGCs |         |       |       |       |       |
|----------------------------------------------------------------------------------------------|---------|-------|-------|-------|-------|
| KRUSKAL-WALLIS TEST                                                                          |         |       |       |       |       |
| Fig 1J                                                                                       | df      |       | F     | p     |       |
|                                                                                              | 4 / 104 |       | 38.46 | <.001 |       |
|                                                                                              | 1w      | 2w    | 3w    | 4w    | 8w    |
| 1w                                                                                           | --      | >.999 | 0.115 | 0.974 | >.999 |
| 2w                                                                                           | >.999   | --    | <.001 | 0.033 | 0.172 |
| 3w                                                                                           | 0.115   | <.001 | --    | 0.008 | <.001 |
| 4w                                                                                           | 0.974   | 0.033 | 0.008 | --    | >.999 |
| 8w                                                                                           | >.999   | 0.172 | <.001 | >.999 | --    |

| Fig 1J | Area of Gephyrin <sup>+</sup> clusters in 4 <sup>th</sup> order dendrites of adult-born DGCs |       |       |       |
|--------|----------------------------------------------------------------------------------------------|-------|-------|-------|
|        | KRUSKAL-WALLIS TEST                                                                          |       |       |       |
|        | df                                                                                           | K     | p     |       |
|        | 3 / 113                                                                                      | 55.79 | <.001 |       |
|        | 2w                                                                                           | 3w    | 4w    | 8w    |
| 2w     | --                                                                                           | <.001 | <.001 | 0.008 |
| 3w     | <.001                                                                                        | --    | <.001 | <.001 |
| 4w     | <.001                                                                                        | <.001 | --    | >.999 |
| 8w     | 0.008                                                                                        | <.001 | >.999 | --    |

| Fig 1J | Area of Gephyrin <sup>+</sup> clusters in 5 <sup>th</sup> order dendrites of adult-born DGCs |       |       |       |
|--------|----------------------------------------------------------------------------------------------|-------|-------|-------|
|        | KRUSKAL-WALLIS TEST                                                                          |       |       |       |
|        | df                                                                                           | K     | p     |       |
|        | 3 / 106                                                                                      | 45.76 | <.001 |       |
|        | 2w                                                                                           | 3w    | 4w    | 8w    |
| 2w     | --                                                                                           | <.001 | <.001 | 0.007 |
| 3w     | <.001                                                                                        | --    | 0.368 | 0.001 |
| 4w     | <.001                                                                                        | 0.368 | --    | 0.442 |
| 8w     | 0.007                                                                                        | 0.001 | 0.442 | --    |

| Fig 1K | Area of Gephyrin <sup>+</sup> clusters in the soma of adult-born DGCs |       |       |       |       |
|--------|-----------------------------------------------------------------------|-------|-------|-------|-------|
|        | KRUSKAL-WALLIS TEST                                                   |       |       |       |       |
|        | df                                                                    | K     |       | p     |       |
|        | 4 / 131                                                               | 38.08 |       | <.001 |       |
|        | 1w                                                                    | 2w    | 3w    | 4w    | 8w    |
| 1w     | --                                                                    | 0.895 | <.001 | >.999 | 0.002 |
| 2w     | 0.895                                                                 | --    | <.001 | >.999 | 0.282 |
| 3w     | <.001                                                                 | <.001 | --    | <.001 | >.999 |
| 4w     | >.999                                                                 | >.999 | <.001 | --    | 0.134 |
| 8w     | 0.002                                                                 | 0.282 | >.999 | 0.134 | --    |

| Fig 1L | Area of Gephyrin <sup>+</sup> clusters in the axon of adult-born DGCs |       |       |       |       |
|--------|-----------------------------------------------------------------------|-------|-------|-------|-------|
|        | KRUSKAL-WALLIS TEST                                                   |       |       |       |       |
|        | df                                                                    | K     |       | p     |       |
|        | 4 / 123                                                               | 28.55 |       | <.001 |       |
|        | 1w                                                                    | 2w    | 3w    | 4w    | 8w    |
| 1w     | --                                                                    | 0.997 | 0.886 | >.999 | 0.056 |
| 2w     | 0.997                                                                 | --    | 0.002 | 0.669 | >.999 |
| 3w     | 0.886                                                                 | 0.002 | --    | 0.378 | <.001 |
| 4w     | >.999                                                                 | 0.669 | 0.378 | --    | 0.016 |
| 8w     | 0.056                                                                 | >.999 | <.001 | 0.016 | --    |

**FIGURE 2:**

| Fig 2A |    | Density of Gephyrin <sup>+</sup> clusters in 1 <sup>st</sup> order dendrites of adult-born DGCs |       |              |              |              | INTER-SUBJECT EFFECT |        |       |
|--------|----|-------------------------------------------------------------------------------------------------|-------|--------------|--------------|--------------|----------------------|--------|-------|
|        |    | Two-way ANOVA                                                                                   |       |              |              |              | Age                  |        |       |
|        |    | GSK-3-OE                                                                                        |       |              |              |              | df                   | F      | p     |
|        |    | 1w                                                                                              | 2w    | 3w           | 4w           | 8w           | 4 / 292              | 59.230 | <.001 |
| WT     | 1w | >.999                                                                                           | >.999 | <.001        | <.001        | <.001        | Genotype             |        |       |
|        | 2w | >.999                                                                                           | >.999 | 0.007        | <.001        | <.001        | df                   | F      | p     |
|        | 3w | <.001                                                                                           | <.001 | <b>0.628</b> | 0.007        | 0.231        | 1 / 292              | 4.01   | 0.046 |
|        | 4w | <.001                                                                                           | <.001 | 0.019        | <b>0.377</b> | 0.976        | Age*Genotype         |        |       |
|        | 8w | <.001                                                                                           | <.001 | >.999        | <.001        | <b>0.006</b> | df                   | F      | p     |
|        |    |                                                                                                 |       |              |              | 4 / 292      | 5.118                | <.001  |       |

| Fig 2B |    | Density of Gephyrin <sup>+</sup> clusters in 2-5 <sup>th</sup> order dendrites of adult-born DGCs |              |              |       |              | INTER-SUBJECT EFFECT |         |       |
|--------|----|---------------------------------------------------------------------------------------------------|--------------|--------------|-------|--------------|----------------------|---------|-------|
|        |    | Two-way ANOVA                                                                                     |              |              |       |              | Age                  |         |       |
|        |    | GSK-3-OE                                                                                          |              |              |       |              | df                   | F       | p     |
|        |    | 1w                                                                                                | 2w           | 3w           | 4w    | 8w           | 4 / 1067             | 297.200 | <.001 |
| WT     | 1w | >.999                                                                                             | 0.276        | <.001        | <.001 | <.001        | Genotype             |         |       |
|        | 2w | 0.097                                                                                             | <b>0.999</b> | <.001        | <.001 | <.001        | df                   | F       | p     |
|        | 3w | <.001                                                                                             | <.001        | <b>0.026</b> | <.001 | 0.027        | 1 / 1067             | 4.932   | 0.027 |
|        | 4w | <.001                                                                                             | <.001        | <.001        | >.999 | 0.988        | Age*Genotype         |         |       |
|        | 8w | <.001                                                                                             | <.001        | <.001        | >.999 | <b>0.982</b> | df                   | F       | p     |
|        |    |                                                                                                   |              |              |       | 4 / 1067     | 1.674                | 0.154   |       |

| Fig 2D         |  | Colocalization between Basson and Gephyrin |       |
|----------------|--|--------------------------------------------|-------|
|                |  | Mann Whitney test                          |       |
|                |  | U                                          | p     |
| WT vs GSK-3-OE |  | 1144                                       | 0.004 |

| Fig 2E         |  | Percentage adult-born DGCs surrounded by PV <sup>+</sup> interneurons |       |       |
|----------------|--|-----------------------------------------------------------------------|-------|-------|
|                |  | Chi-square                                                            |       |       |
|                |  | df                                                                    | z     | p     |
| WT vs GSK-3-OE |  | 1 / 13.13                                                             | 3.623 | <.001 |

| Fig 2G |    | PV <sup>+</sup> area surrounding Gephyrin <sup>+</sup> clusters in the soma of adult-born DGCs |       |              |              |              | INTER-SUBJECT EFFECT |        |       |
|--------|----|------------------------------------------------------------------------------------------------|-------|--------------|--------------|--------------|----------------------|--------|-------|
|        |    | Two-way ANOVA                                                                                  |       |              |              |              | Age                  |        |       |
|        |    | GSK-3-OE                                                                                       |       |              |              |              | df                   | F      | p     |
|        |    | 1w                                                                                             | 2w    | 3w           | 4w           | 8w           | 4 / 655              | 9.041  | <.001 |
| WT     | 1w | <b>0.204</b>                                                                                   | <.001 | 0.228        | 0.656        | 0.009        | Genotype             |        |       |
|        | 2w | >.999                                                                                          | <.001 | <.001        | <.001        | <.001        | df                   | F      | p     |
|        | 3w | 0.015                                                                                          | <.001 | <b>0.853</b> | 0.996        | 0.198        | 1 / 655              | 18.820 | <.001 |
|        | 4w | <.001                                                                                          | 0.085 | >.999        | <b>0.972</b> | >.999        | Age*Genotype         |        |       |
|        | 8w | 0.018                                                                                          | <.001 | 0.621        | 0.963        | <b>0.059</b> | df                   | F      | p     |
|        |    |                                                                                                |       |              |              | 4 / 655      | 18.590               | <.001  |       |

| Fig 2H         |  | Intensity of Lectin in PNNs surrounding PV interneurons |       |
|----------------|--|---------------------------------------------------------|-------|
|                |  | Mann Whitney test                                       |       |
|                |  | U                                                       | p     |
| WT vs GSK-3-OE |  | 11                                                      | 0.009 |

| Fig 2I         |  | Intensity of Aggrecan in PNNs surrounding PV interneurons |    |       |
|----------------|--|-----------------------------------------------------------|----|-------|
|                |  | Student t- Test                                           |    |       |
|                |  | t                                                         | df | p     |
| WT vs GSK-3-OE |  | 5.021                                                     | 15 | <.001 |

**FIGURE 3:**

| Fig 3E    | Frequency of mPSCs in developmentally generated and 8-week-old adult-born DGCs of WT and GSK-3 $\beta$ -OE mice |         |  | INTER-SUBJECT EFFECT |        |        |
|-----------|-----------------------------------------------------------------------------------------------------------------|---------|--|----------------------|--------|--------|
|           | Two-way ANOVA                                                                                                   |         |  | Cell age             |        |        |
|           | GSK-3-OE                                                                                                        |         |  | df                   | F      | p      |
|           |                                                                                                                 |         |  | 1 / 41               | 2.024  | 0.1624 |
| WT        | Embryonic                                                                                                       | Adult   |  | Genotype             |        |        |
| Embryonic | >0.9999                                                                                                         | --      |  | df                   | F      | p      |
| Adult     | --                                                                                                              | >0.9999 |  | 1 / 41               | 0.4897 | 0.488  |
|           |                                                                                                                 |         |  | Age*Genotype         |        |        |
|           |                                                                                                                 |         |  | df                   | F      | p      |
|           |                                                                                                                 |         |  | 1 / 41               | 0.0418 | 0.839  |

| Fig 3F    | Amplitude of mPSCs in developmentally generated and 8-week-old adult-born DGCs of WT and GSK-3 $\beta$ -OE mice |        |  | INTER-SUBJECT EFFECT |       |        |
|-----------|-----------------------------------------------------------------------------------------------------------------|--------|--|----------------------|-------|--------|
|           | Two-way ANOVA                                                                                                   |        |  | Cell age             |       |        |
|           | GSK-3-OE                                                                                                        |        |  | df                   | F     | p      |
|           |                                                                                                                 |        |  | 1 / 41               | 0.091 | 0.7641 |
| WT        | Embryonic                                                                                                       | Adult  |  | Genotype             |       |        |
| Embryonic | 0.4023                                                                                                          | --     |  | df                   | F     | p      |
| Adult     | --                                                                                                              | 0.0406 |  | 1 / 41               | 6.683 | 0.0134 |
|           |                                                                                                                 |        |  | Age*Genotype         |       |        |
|           |                                                                                                                 |        |  | df                   | F     | p      |
|           |                                                                                                                 |        |  | 1 / 41               | 0.438 | 0.5119 |

| Fig 3G    | Slope of mPSCs in developmentally generated and 8-week-old adult-born DGCs of WT and GSK-3 $\beta$ -OE mice |        |  | INTER-SUBJECT EFFECT |       |        |
|-----------|-------------------------------------------------------------------------------------------------------------|--------|--|----------------------|-------|--------|
|           | Two-way ANOVA                                                                                               |        |  | Cell age             |       |        |
|           | GSK-3-OE                                                                                                    |        |  | df                   | F     | p      |
|           |                                                                                                             |        |  | 1 / 41               | 0.025 | 0.8748 |
| WT        | Embryonic                                                                                                   | Adult  |  | Genotype             |       |        |
| Embryonic | 0.7579                                                                                                      | --     |  | df                   | F     | p      |
| Adult     | --                                                                                                          | 0.0221 |  | 1 / 41               | 5.993 | 0.0187 |
|           |                                                                                                             |        |  | Age*Genotype         |       |        |
|           |                                                                                                             |        |  | df                   | F     | p      |
|           |                                                                                                             |        |  | 1 / 41               | 1.280 | 0.2645 |

| Fig 3H | AIS Length    |       |       | INTER-SUBJECT EFFECT |        |       |
|--------|---------------|-------|-------|----------------------|--------|-------|
|        | Two-way ANOVA |       |       | Age                  |        |       |
|        | GSK-3-OE      |       |       | df                   | F      | p     |
|        |               |       |       | 2 / 166              | 17.940 | <.001 |
| WT     | 2w            | 4w    | 8w    | Genotype             |        |       |
| 2w     | 0.022         | >.999 | >.999 | df                   | F      | p     |
| 4w     | <.001         | 0.026 | 0.005 | 1 / 166              | 47.110 | <.001 |
| 8w     | <.001         | <.001 | <.001 | Age*Genotype         |        |       |
|        |               |       |       | df                   | F      | p     |
|        |               |       |       | 2 / 166              | 2.085  | 0.128 |

| Fig 3I | AIS Starting point |       |       | INTER-SUBJECT EFFECT |        |       |
|--------|--------------------|-------|-------|----------------------|--------|-------|
|        | Two-way ANOVA      |       |       | Age                  |        |       |
|        | GSK-3-OE           |       |       | df                   | F      | p     |
|        |                    |       |       | 2 / 167              | 1.940  | 0.147 |
| WT     | 2w                 | 4w    | 8w    | Genotype             |        |       |
| 2w     | 0.373              | 0.909 | 0.17  | df                   | F      | p     |
| 4w     | 0.073              | 0.385 | 0.016 | 1 / 167              | 11.620 | <.001 |
| 8w     | 0.569              | 0.985 | 0.33  | Age*Genotype         |        |       |
|        |                    |       |       | df                   | F      | p     |
|        |                    |       |       | 2 / 167              | 0.0268 | 0.974 |

| Fig 3N | Colocalization between GFP and Syn in CA3 MFTs |              |              | INTER-SUBJECT EFFECT |        |       |
|--------|------------------------------------------------|--------------|--------------|----------------------|--------|-------|
|        | Two-way ANOVA                                  |              |              | Age                  |        |       |
|        |                                                |              |              | df                   | F      | p     |
|        |                                                |              |              | 2 / 98               | 27.960 | <.001 |
| WT     | GSK-3-OE                                       |              |              | Genotype             |        |       |
|        | 2w                                             | 4w           | 8w           | df                   | F      | p     |
|        |                                                |              |              | 1 / 98               | 3.688  | 0.058 |
| 2w     | >.999                                          | 0.035        | <.001        | Age*Genotype         |        |       |
| 4w     | 0.845                                          | <b>0.238</b> | <.001        | df                   | F      | p     |
| 8w     | <.001                                          | 0.867        | <b>0.832</b> | 2 / 98               | 1.181  | 0.311 |

| Fig 3O | Colocalization between GFP and Syn in CA2 MFTs |              |              | INTER-SUBJECT EFFECT |        |       |
|--------|------------------------------------------------|--------------|--------------|----------------------|--------|-------|
|        | Two-way ANOVA                                  |              |              | Age                  |        |       |
|        |                                                |              |              | df                   | F      | p     |
|        |                                                |              |              | 2 / 65               | 24.100 | <.001 |
| WT     | GSK-3-OE                                       |              |              | Genotype             |        |       |
|        | 2w                                             | 4w           | 8w           | df                   | F      | p     |
|        |                                                |              |              | 1 / 65               | 12.52  | <.001 |
| 2w     | <b>0.992</b>                                   | <.001        | <.001        | Age*Genotype         |        |       |
| 4w     | 0.906                                          | <b>0.008</b> | <.001        | df                   | F      | p     |
| 8w     | 0.001                                          | 0.956        | <b>0.285</b> | 2 / 65               | 1.999  | 0.144 |

| Fig 3P         | Total exploratory time (s) during the 3 <sup>rd</sup> day of the NLP test |    |       |
|----------------|---------------------------------------------------------------------------|----|-------|
|                | Student t- Test                                                           |    |       |
|                | t                                                                         | df | p     |
| WT vs GSK-3-OE | 3.774                                                                     | 15 | 0.002 |

| Fig 3Q         | Memory index during the 3 <sup>rd</sup> day of the NLP test |    |       |
|----------------|-------------------------------------------------------------|----|-------|
|                | Student t- Test                                             |    |       |
|                | t                                                           | df | p     |
| WT vs GSK-3-OE | 2.352                                                       | 15 | 0.033 |

**SUPPLEMENTARY FIGURE S1:**

| Percentage of the soma occupied by Gephyrin <sup>+</sup> clusters in adult-born DGCs |         |       |       |       |       |
|--------------------------------------------------------------------------------------|---------|-------|-------|-------|-------|
| KRUSKAL-WALLIS TEST                                                                  |         |       |       |       |       |
|                                                                                      | df      | K     | p     |       |       |
| Fig S1G                                                                              | 4 / 155 | 80.29 | <.001 |       |       |
|                                                                                      | 1w      | 2w    | 3w    | 4w    | 8w    |
| 1w                                                                                   | --      | >.999 | <.001 | <.001 | <.001 |
| 2w                                                                                   | >.999   | --    | <.001 | <.001 | <.001 |
| 3w                                                                                   | <.001   | <.001 | --    | >.999 | >.999 |
| 4w                                                                                   | <.001   | <.001 | >.999 | --    | >.999 |
| 8w                                                                                   | <.001   | <.001 | >.999 | >.999 | --    |

| Percentage of the Apical Soma occupied by Gephyrin <sup>+</sup> clusters in adult-born DGCs |         |       |       |       |       |
|---------------------------------------------------------------------------------------------|---------|-------|-------|-------|-------|
| KRUSKAL-WALLIS TEST                                                                         |         |       |       |       |       |
|                                                                                             | df      | K     | p     |       |       |
| Fig S1H                                                                                     | 4 / 161 | 45.46 | <.001 |       |       |
|                                                                                             | 1w      | 2w    | 3w    | 4w    | 8w    |
| 1w                                                                                          | --      | <.001 | 0.002 | <.001 | <.001 |
| 2w                                                                                          | <.001   | --    | >.999 | >.999 | >.999 |
| 3w                                                                                          | 0.002   | >.999 | --    | 0.176 | >.999 |
| 4w                                                                                          | <.001   | >.999 | 0.176 | --    | >.999 |
| 8w                                                                                          | <.001   | >.999 | >.999 | >.999 | --    |

| Percentage of the Basal Soma occupied by Gephyrin <sup>+</sup> clusters in adult-born DGCs |         |       |       |       |       |
|--------------------------------------------------------------------------------------------|---------|-------|-------|-------|-------|
| KRUSKAL-WALLIS TEST                                                                        |         |       |       |       |       |
|                                                                                            | df      | K     | p     |       |       |
| Fig S1I                                                                                    | 4 / 155 | 62.58 | <.001 |       |       |
|                                                                                            | 1w      | 2w    | 3w    | 4w    | 8w    |
| 1w                                                                                         | --      | >.999 | <.001 | <.001 | <.001 |
| 2w                                                                                         | >.999   | --    | <.001 | <.001 | <.001 |
| 3w                                                                                         | <.001   | <.001 | --    | >.999 | >.999 |
| 4w                                                                                         | <.001   | <.001 | >.999 | --    | >.999 |
| 8w                                                                                         | <.001   | <.001 | >.999 | >.999 | --    |

| Percentage of the axon occupied by Gephyrin <sup>+</sup> clusters in adult-born DGCs |         |       |       |       |       |
|--------------------------------------------------------------------------------------|---------|-------|-------|-------|-------|
| KRUSKAL-WALLIS TEST                                                                  |         |       |       |       |       |
|                                                                                      | df      | K     | p     |       |       |
| Fig S1J                                                                              | 4 / 125 | 73.23 | <.001 |       |       |
|                                                                                      | 1w      | 2w    | 3w    | 4w    | 8w    |
| 1w                                                                                   | --      | 0.003 | 0.235 | <.001 | <.001 |
| 2w                                                                                   | 0.003   | --    | >.999 | 0.024 | <.001 |
| 3w                                                                                   | 0.235   | >.999 | --    | <.001 | <.001 |
| 4w                                                                                   | <.001   | 0.024 | <.001 | --    | >.999 |
| 8w                                                                                   | <.001   | <.001 | <.001 | >.999 | --    |

| Fig S1K | PV <sup>+</sup> area surrounding Gephyrin <sup>+</sup> clusters in the 1 <sup>st</sup> order dendrites of adult-born DGCs |       |       |       |       |
|---------|---------------------------------------------------------------------------------------------------------------------------|-------|-------|-------|-------|
|         | KRUSKAL-WALLIS TEST                                                                                                       |       |       |       |       |
|         | df                                                                                                                        | K     | p     |       |       |
|         | 4 / 141                                                                                                                   | 13.78 | 0.008 |       |       |
|         | 1w                                                                                                                        | 2w    | 3w    | 4w    | 8w    |
| 1w      | --                                                                                                                        | >.999 | 0.876 | >.999 | 0.643 |
| 2w      | >.999                                                                                                                     | --    | 0.309 | >.999 | 0.03  |
| 3w      | 0.876                                                                                                                     | 0.309 | --    | >.999 | >.999 |
| 4w      | >.999                                                                                                                     | >.999 | >.999 | --    | 0.236 |
| 8w      | 0.643                                                                                                                     | 0.03  | >.999 | 0.236 | --    |

| Fig S1L | PV <sup>+</sup> area surrounding Gephyrin <sup>+</sup> clusters in the Soma of adult-born DGCs |       |       |       |       |
|---------|------------------------------------------------------------------------------------------------|-------|-------|-------|-------|
|         | KRUSKAL-WALLIS TEST                                                                            |       |       |       |       |
|         | df                                                                                             | K     | p     |       |       |
|         | 4 / 141                                                                                        | 52.26 | <.001 |       |       |
|         | 1w                                                                                             | 2w    | 3w    | 4w    | 8w    |
| 1w      | --                                                                                             | 0.002 | >.999 | 0.005 | >.999 |
| 2w      | 0.002                                                                                          | --    | <.001 | <.001 | <.001 |
| 3w      | >.999                                                                                          | <.001 | --    | 0.113 | >.999 |
| 4w      | 0.005                                                                                          | <.001 | 0.113 | --    | 0.398 |
| 8w      | >.999                                                                                          | <.001 | >.999 | 0.398 | --    |

| Fig S1M | PV <sup>+</sup> area surrounding Gephyrin <sup>+</sup> clusters in the Apical Soma of adult-born DGCs |       |       |       |       |
|---------|-------------------------------------------------------------------------------------------------------|-------|-------|-------|-------|
|         | KRUSKAL-WALLIS TEST                                                                                   |       |       |       |       |
|         | df                                                                                                    | K     | p     |       |       |
|         | 4 / 135                                                                                               | 42.34 | <.001 |       |       |
|         | 1w                                                                                                    | 2w    | 3w    | 4w    | 8w    |
| 1w      | --                                                                                                    | 0.022 | 0.001 | >.999 | >.999 |
| 2w      | 0.022                                                                                                 | --    | >.999 | <.001 | 0.017 |
| 3w      | 0.001                                                                                                 | >.999 | --    | <.001 | <.001 |
| 4w      | >.999                                                                                                 | <.001 | <.001 | --    | 0.756 |
| 8w      | >.999                                                                                                 | 0.017 | <.001 | 0.756 | --    |

| Fig S1N | PV <sup>+</sup> area surrounding Gephyrin <sup>+</sup> clusters in the Basal Soma of adult-born DGCs |       |       |       |       |
|---------|------------------------------------------------------------------------------------------------------|-------|-------|-------|-------|
|         | KRUSKAL-WALLIS TEST                                                                                  |       |       |       |       |
|         | df                                                                                                   | K     | p     |       |       |
|         | 4 / 156                                                                                              | 37.26 | <.001 |       |       |
|         | 1w                                                                                                   | 2w    | 3w    | 4w    | 8w    |
| 1w      | --                                                                                                   | >.999 | <.001 | <.001 | 0.007 |
| 2w      | >.999                                                                                                | --    | 0.001 | 0.002 | 0.192 |
| 3w      | <.001                                                                                                | 0.001 | --    | >.999 | 0.909 |
| 4w      | <.001                                                                                                | 0.002 | >.999 | --    | >.999 |
| 8w      | 0.007                                                                                                | 0.192 | 0.909 | >.999 | --    |

| Fig S1O | PV <sup>+</sup> area surrounding Gephyrin <sup>+</sup> clusters in the axon of adult-born DGCs |       |       |       |       |
|---------|------------------------------------------------------------------------------------------------|-------|-------|-------|-------|
|         | KRUSKAL-WALLIS TEST                                                                            |       |       |       |       |
|         | df                                                                                             | K     | p     |       |       |
|         | 4 / 223                                                                                        | 41.49 | <.001 |       |       |
|         | 1w                                                                                             | 2w    | 3w    | 4w    | 8w    |
| 1w      | --                                                                                             | <.001 | <.001 | <.001 | 0.002 |
| 2w      | <.001                                                                                          | --    | >.999 | 0.025 | >.999 |
| 3w      | <.001                                                                                          | >.999 | --    | 0.032 | >.999 |
| 4w      | <.001                                                                                          | 0.025 | 0.032 | --    | 0.004 |
| 8w      | 0.002                                                                                          | >.999 | >.999 | 0.004 | --    |



**SUPPLEMENTARY FIGURE S2:**

| <b>Total density of synaptic vesicles in inhibitory synapses made onto adult-born DGCs</b> |           |           |            |
|--------------------------------------------------------------------------------------------|-----------|-----------|------------|
| <b>KRUSKAL-WALLIS TEST</b>                                                                 |           |           |            |
|                                                                                            | <b>df</b> | <b>K</b>  | <b>p</b>   |
| <b>Fig S2B</b>                                                                             | 2 / 13    | 0.7465    | 0.721      |
|                                                                                            | <b>4w</b> | <b>8w</b> | <b>60w</b> |
| <b>4w</b>                                                                                  | --        | >.999     | >.999      |
| <b>8w</b>                                                                                  | >.999     | --        | >.999      |
| <b>60w</b>                                                                                 | >.999     | >.999     | --         |

| <b>Density of the readily-releasable pool of synaptic vesicles in inhibitory synapses made onto adult-born DGCs</b> |           |           |            |
|---------------------------------------------------------------------------------------------------------------------|-----------|-----------|------------|
| <b>KRUSKAL-WALLIS TEST</b>                                                                                          |           |           |            |
|                                                                                                                     | <b>df</b> | <b>K</b>  | <b>p</b>   |
| <b>Fig S2C</b>                                                                                                      | 2 / 13    | 1.137     | 0.606      |
|                                                                                                                     | <b>4w</b> | <b>8w</b> | <b>60w</b> |
| <b>4w</b>                                                                                                           | --        | >.999     | >.999      |
| <b>8w</b>                                                                                                           | >.999     | --        | >.999      |
| <b>60w</b>                                                                                                          | >.999     | >.999     | --         |

| <b>Density of the recycling pool of synaptic vesicles in inhibitory synapses made onto adult-born DGCs</b> |           |           |            |
|------------------------------------------------------------------------------------------------------------|-----------|-----------|------------|
| <b>KRUSKAL-WALLIS TEST</b>                                                                                 |           |           |            |
|                                                                                                            | <b>df</b> | <b>K</b>  | <b>p</b>   |
| <b>Fig S2D</b>                                                                                             | 2 / 13    | 0.6782    | 0.74       |
|                                                                                                            | <b>4w</b> | <b>8w</b> | <b>60w</b> |
| <b>4w</b>                                                                                                  | --        | >.999     | >.999      |
| <b>8w</b>                                                                                                  | >.999     | --        | >.999      |
| <b>60w</b>                                                                                                 | >.999     | >.999     | --         |

| <b>Density of the reserve pool of synaptic vesicles in inhibitory synapses made onto adult-born DGCs</b> |           |           |            |
|----------------------------------------------------------------------------------------------------------|-----------|-----------|------------|
| <b>KRUSKAL-WALLIS TEST</b>                                                                               |           |           |            |
|                                                                                                          | <b>df</b> | <b>K</b>  | <b>p</b>   |
| <b>Fig S2E</b>                                                                                           | 2 / 13    | 3.233     | 0.213      |
|                                                                                                          | <b>4w</b> | <b>8w</b> | <b>60w</b> |
| <b>4w</b>                                                                                                | --        | >.999     | 0.313      |
| <b>8w</b>                                                                                                | >.999     | --        | 0.265      |
| <b>60w</b>                                                                                               | 0.313     | 0.265     | --         |

**SUPPLEMENTARY FIGURE S3:**

| Fig S3A |    | Density of Gephyrin <sup>+</sup> clusters in the Soma of adult-born DGCs |              |              |                 |              | INTER-SUBJECT EFFECT |        |       |
|---------|----|--------------------------------------------------------------------------|--------------|--------------|-----------------|--------------|----------------------|--------|-------|
|         |    | Two-way ANOVA                                                            |              |              |                 |              | Age                  |        |       |
|         |    | GSK-3-OE                                                                 |              |              |                 |              | df                   | F      | p     |
|         |    | 1w                                                                       | 2w           | 3w           | 4w              | 8w           | 4 / 306              | 39.010 | <.001 |
| WT      | 1w | <b>0.995</b>                                                             | >.999        | 0.174        | <.001           | <.001        | Genotype             |        |       |
|         | 2w | 0.95                                                                     | <b>0.993</b> | 0.356        | <.001           | <.001        | df                   | F      | p     |
|         | 3w | <.001                                                                    | <.001        | <b>0.917</b> | 0.242           | 0.952        | 1 / 306              | 0.156  | 0.693 |
|         | 4w | <.001                                                                    | <.001        | <.001        | <b>&gt;.999</b> | 0.756        | Age*Genotype         |        |       |
|         | 8w | 0.026                                                                    | 0.045        | >.999        | 0.002           | <b>0.114</b> | df                   | F      | p     |
|         |    |                                                                          |              |              |                 | 4 / 306      | 3.061                | 0.017  |       |

| Fig S3B |    | Density of Gephyrin <sup>+</sup> clusters in the Axon of adult-born DGCs |                 |              |              |                 | INTER-SUBJECT EFFECT |        |       |
|---------|----|--------------------------------------------------------------------------|-----------------|--------------|--------------|-----------------|----------------------|--------|-------|
|         |    | Two-way ANOVA                                                            |                 |              |              |                 | Age                  |        |       |
|         |    | GSK-3-OE                                                                 |                 |              |              |                 | df                   | F      | p     |
|         |    | 1w                                                                       | 2w              | 3w           | 4w           | 8w              | 4 / 249              | 51.990 | <.001 |
| WT      | 1w | <b>0.894</b>                                                             | >.999           | <.001        | <.001        | <.001           | Genotype             |        |       |
|         | 2w | 0.933                                                                    | <b>&gt;.999</b> | 0.005        | <.001        | <.001           | df                   | F      | p     |
|         | 3w | <.001                                                                    | 0.131           | <b>0.997</b> | 0.005        | 0.808           | 1 / 249              | 0.164  | 0.686 |
|         | 4w | <.001                                                                    | <.001           | <.001        | <b>0.914</b> | 0.012           | Age*Genotype         |        |       |
|         | 8w | <.001                                                                    | 0.015           | >.999        | 0.105        | <b>&gt;.999</b> | df                   | F      | p     |
|         |    |                                                                          |                 |              |              | 4 / 249         | 1.353                | 0.251  |       |

| Fig S3C |    | Area of Gephyrin <sup>+</sup> clusters in 1 <sup>st</sup> order dendrites of adult-born DGCs |                 |              |                 |                 | INTER-SUBJECT EFFECT |       |       |
|---------|----|----------------------------------------------------------------------------------------------|-----------------|--------------|-----------------|-----------------|----------------------|-------|-------|
|         |    | Two-way ANOVA                                                                                |                 |              |                 |                 | Age                  |       |       |
|         |    | GSK-3-OE                                                                                     |                 |              |                 |                 | df                   | F     | p     |
|         |    | 1w                                                                                           | 2w              | 3w           | 4w              | 8w              | 4 / 187              | 8.961 | <.001 |
| WT      | 1w | <b>0.914</b>                                                                                 | 0.027           | >.999        | >.999           | 0.998           | Genotype             |       |       |
|         | 2w | 0.115                                                                                        | <b>&lt;.001</b> | 0.445        | 0.988           | >.999           | df                   | F     | p     |
|         | 3w | 0.946                                                                                        | 0.919           | <b>0.031</b> | <.001           | <.001           | 1 / 187              | 4.730 | 0.031 |
|         | 4w | 0.325                                                                                        | <.001           | 0.87         | <b>&gt;.999</b> | 0.997           | Age*Genotype         |       |       |
|         | 8w | 0.405                                                                                        | <.001           | 0.915        | >.999           | <b>&gt;.999</b> | df                   | F     | p     |
|         |    |                                                                                              |                 |              |                 | 4 / 187         | 10.440               | <.001 |       |

| Fig S3D |    | Area of Gephyrin <sup>+</sup> clusters in 2-5 <sup>th</sup> order dendrites of adult-born DGCs |              |                 |              |              | INTER-SUBJECT EFFECT |       |       |
|---------|----|------------------------------------------------------------------------------------------------|--------------|-----------------|--------------|--------------|----------------------|-------|-------|
|         |    | Two-way ANOVA                                                                                  |              |                 |              |              | Age                  |       |       |
|         |    | GSK-3-OE                                                                                       |              |                 |              |              | df                   | F     | p     |
|         |    | 1w                                                                                             | 2w           | 3w              | 4w           | 8w           | 4 / 855              | 74.1  | <.001 |
| WT      | 1w | <b>0.997</b>                                                                                   | 0.965        | <.001           | 0.21         | 648          | Genotype             |       |       |
|         | 2w | <.001                                                                                          | <b>0.611</b> | <.001           | 0.005        | 0.458        | df                   | F     | p     |
|         | 3w | <.001                                                                                          | <.001        | <b>&lt;.001</b> | <.001        | <.001        | 1 / 855              | 8.41  | 0.04  |
|         | 4w | <.001                                                                                          | 0.556        | 0.034           | <b>0.998</b> | 0.186        | Age*Genotype         |       |       |
|         | 8w | <.001                                                                                          | 0.527        | 0.052           | 0.996        | <b>0.172</b> | df                   | F     | p     |
|         |    |                                                                                                |              |                 |              | 4 / 855      | 14.13                | <.001 |       |

| Fig S3E |    | Area of Gephyrin <sup>+</sup> clusters in the soma of adult-born DGCs |              |             |                 |                 | INTER-SUBJECT EFFECT |       |       |
|---------|----|-----------------------------------------------------------------------|--------------|-------------|-----------------|-----------------|----------------------|-------|-------|
|         |    | Two-way ANOVA                                                         |              |             |                 |                 | Age                  |       |       |
|         |    | GSK-3-OE                                                              |              |             |                 |                 | df                   | F     | p     |
|         |    | 1w                                                                    | 2w           | 3w          | 4w              | 8w              | 4 / 259              | 8.533 | <.001 |
| WT      | 1w | <b>0.062</b>                                                          | <.001        | 0.062       | 0.971           | >.999           | Genotype             |       |       |
|         | 2w | 0.552                                                                 | <b>0.002</b> | 0.611       | >.999           | 0.934           | df                   | F     | p     |
|         | 3w | 0.094                                                                 | 0.923        | <b>0.02</b> | <.001           | <.001           | 1 / 259              | 0.117 | 0.732 |
|         | 4w | 0.432                                                                 | 0.001        | 0.484       | <b>&gt;.999</b> | 0.987           | Age*Genotype         |       |       |
|         | 8w | 0.96                                                                  | >.999        | 0.838       | 0.022           | <b>&lt;.001</b> | df                   | F     | p     |
|         |    |                                                                       |              |             |                 | 4 / 259         | 14.930               | <.001 |       |

| Fig S3F |    | Area of Gephyrin <sup>+</sup> clusters in the axon of adult-born DGCs |                 |                 |                 |                 | INTER-SUBJECT EFFECT |        |       |
|---------|----|-----------------------------------------------------------------------|-----------------|-----------------|-----------------|-----------------|----------------------|--------|-------|
|         |    | Two-way ANOVA                                                         |                 |                 |                 |                 | Age                  |        |       |
|         |    | GSK-3-OE                                                              |                 |                 |                 |                 | df                   | F      | p     |
|         |    | 1w                                                                    | 2w              | 3w              | 4w              | 8w              | 4 / 216              | 17.350 | <.001 |
| WT      | 1w | <b>0.983</b>                                                          | 0.773           | 0.998           | >.999           | 0.945           | Genotype             |        |       |
|         | 2w | 0.023                                                                 | <b>&lt;.001</b> | <.001           | 0.01            | 0.521           | df                   | F      | p     |
|         | 3w | >.999                                                                 | 0.998           | <b>&gt;.999</b> | 0.95            | 0.281           | 1 / 216              | 22.240 | <.001 |
|         | 4w | 0.991                                                                 | 0.773           | >.999           | <b>&gt;.999</b> | 0.714           | Age*Genotype         |        |       |
|         | 8w | <.001                                                                 | <.001           | <.001           | <.001           | <b>&lt;.001</b> | df                   | F      | p     |
|         |    |                                                                       |                 |                 |                 | 4 / 216         | 8.831                | <.001  |       |

| Fig S3G |    | PV <sup>+</sup> area surrounding Gephyrin <sup>+</sup> clusters in the 1 <sup>st</sup> order dendrites of newborn DGCs |       |       |              |             | INTER-SUBJECT EFFECT |       |       |
|---------|----|------------------------------------------------------------------------------------------------------------------------|-------|-------|--------------|-------------|----------------------|-------|-------|
|         |    | Two-way ANOVA                                                                                                          |       |       |              |             | Age                  |       |       |
|         |    | GSK-3-OE                                                                                                               |       |       |              |             | df                   | F     | p     |
|         |    |                                                                                                                        |       |       |              |             | 4 / 312              | 9.093 | <.001 |
|         |    | 1w                                                                                                                     | 2w    | 3w    | 4w           | 8w          | Genotype             |       |       |
| WT      | 1w | >.999                                                                                                                  | >.999 | 0.947 | 0.942        | 0.751       | df                   | F     | p     |
|         | 2w | 0.983                                                                                                                  | >.999 | 0.365 | 0.155        | <.001       | 1 / 312              | 0.802 | 0.371 |
|         | 3w | 0.067                                                                                                                  | 0.276 | >.999 | >.999        | 0.751       | Age*Genotype         |       |       |
|         | 4w | 0.729                                                                                                                  | 0.997 | 0.919 | <b>0.801</b> | 0.022       | df                   | F     | p     |
|         | 8w | 0.009                                                                                                                  | 0.034 | >.999 | 0.999        | <b>0.93</b> | 4 / 312              | 0.573 | 0.682 |

| Fig S3H |    | PV <sup>+</sup> area surrounding Gephyrin <sup>+</sup> clusters in the axon of newborn DGCs |              |             |              |              | INTER-SUBJECT EFFECT |       |       |
|---------|----|---------------------------------------------------------------------------------------------|--------------|-------------|--------------|--------------|----------------------|-------|-------|
|         |    | Two-way ANOVA                                                                               |              |             |              |              | Age                  |       |       |
|         |    | GSK-3-OE                                                                                    |              |             |              |              | df                   | F     | p     |
|         |    |                                                                                             |              |             |              |              | 4 / 388              | 9.552 | <.001 |
|         |    | 1w                                                                                          | 2w           | 3w          | 4w           | 8w           | Genotype             |       |       |
| WT      | 1w | >.999                                                                                       | 0.001        | <.001       | <.001        | <.001        | df                   | F     | p     |
|         | 2w | 0.415                                                                                       | <b>0.869</b> | 0.161       | 0.517        | 0.089        | 1 / 388              | 2.367 | 0.125 |
|         | 3w | 0.2                                                                                         | 0.993        | <b>0.44</b> | 0.887        | 0.281        | Age*Genotype         |       |       |
|         | 4w | 0.003                                                                                       | 0.815        | >.999       | <b>0.729</b> | >.999        | df                   | F     | p     |
|         | 8w | 0.302                                                                                       | 0.889        | 0.11        | 0.451        | <b>0.053</b> | 4 / 388              | 4.048 | 0.003 |

| Fig S3I        |  | Density of PV <sup>+</sup> interneurons |    |       |
|----------------|--|-----------------------------------------|----|-------|
|                |  | Student t- Test                         |    |       |
|                |  | t                                       | df | p     |
| WT vs GSK-3-OE |  | 0.5512                                  | 16 | 0.589 |

| Fig S3J |         | Classification of DG Parvalbumin (PV) <sup>+</sup> interneurons according to the intensity of Lectin <sup>+</sup> perineuronal nets (PNNs) |              |              |              |              |         |         |         |         |                    | INTER-SUBJECT EFFECT |        |       |
|---------|---------|--------------------------------------------------------------------------------------------------------------------------------------------|--------------|--------------|--------------|--------------|---------|---------|---------|---------|--------------------|----------------------|--------|-------|
|         |         | Two-way ANOVA                                                                                                                              |              |              |              |              |         |         |         |         |                    | Intensity            |        |       |
|         |         | GSK-3-OE                                                                                                                                   |              |              |              |              |         |         |         |         |                    | df                   | F      | p     |
|         |         |                                                                                                                                            |              |              |              |              |         |         |         |         |                    | 11 / 192             | 34.570 | <.001 |
|         |         | 0-20                                                                                                                                       | 20-40        | 40-60        | 60-80        | 80-100       | 100-120 | 120-140 | 140-160 | 160-180 | Genotype           |                      |        |       |
| WT      | 0-20    | <.001                                                                                                                                      | <.001        | 0.344        | >.999        | >.999        | >.999   | 0.996   | 0.99    | 0.996   | df                 | F                    | p      |       |
|         | 20-40   | >.999                                                                                                                                      | <b>0.999</b> | 0.22         | <.001        | <.001        | <.001   | <.001   | <.001   | <.001   | 11 / 192           | 34.570               | <.001  |       |
|         | 40-60   | >.999                                                                                                                                      | 0.998        | <b>0.231</b> | <.001        | <.001        | <.001   | <.001   | <.001   | <.001   | Age*Genotype       |                      |        |       |
|         | 60-80   | 0.003                                                                                                                                      | <.001        | >.999        | <b>0.975</b> | 0.031        | 0.051   | 0.004   | 0.003   | 0.004   | df                 | F                    | p      |       |
|         | 80-100  | <.001                                                                                                                                      | <.001        | 0.878        | >.999        | <b>0.977</b> | 0.992   | 0.764   | 0.693   | 0.764   | 1 / 192            | 3.11E-20             | >.999  |       |
|         | 100-120 | <.001                                                                                                                                      | <.001        | 0.155        | >.999        | >.999        | >.999   | >.999   | >.999   | >.999   | Intensity*Genotype |                      |        |       |
|         | 120-140 | <.001                                                                                                                                      | <.001        | 0.063        | 0.996        | >.999        | >.999   | >.999   | >.999   | >.999   | df                 | F                    | p      |       |
|         | 140-160 | <.001                                                                                                                                      | <.001        | 0.008        | 0.869        | >.999        | >.999   | >.999   | >.999   | >.999   | 11 / 192           | 6.610                | <.001  |       |
| 160-180 | <.001   | <.001                                                                                                                                      | 0.001        | 0.573        | >.999        | >.999        | >.999   | >.999   | >.999   |         |                    |                      |        |       |

| Fig S3K |         | Classification of DG Parvalbumin (PV) <sup>+</sup> interneurons according to the intensity of Aggrecan <sup>+</sup> perineuronal nets (PNNs) |              |              |       |              |         |         |         |         |                    | INTER-SUBJECT EFFECT |        |       |
|---------|---------|----------------------------------------------------------------------------------------------------------------------------------------------|--------------|--------------|-------|--------------|---------|---------|---------|---------|--------------------|----------------------|--------|-------|
|         |         | Two-way ANOVA                                                                                                                                |              |              |       |              |         |         |         |         |                    | Intensity            |        |       |
|         |         | GSK-3-OE                                                                                                                                     |              |              |       |              |         |         |         |         |                    | df                   | F      | p     |
|         |         |                                                                                                                                              |              |              |       |              |         |         |         |         |                    | 11 / 192             | 42.360 | <.001 |
|         |         | 0-20                                                                                                                                         | 20-40        | 40-60        | 60-80 | 80-100       | 100-120 | 120-140 | 140-160 | 160-180 | Genotype           |                      |        |       |
| WT      | 0-20    | <.001                                                                                                                                        | 0.934        | 0.004        | <.001 | <.001        | <.001   | <.001   | <.001   | <.001   | df                 | F                    | p      |       |
|         | 20-40   | <.001                                                                                                                                        | <b>0.002</b> | <.001        | <.001 | <.001        | <.001   | <.001   | <.001   | <.001   | 11 / 192           | 42.360               | <.001  |       |
|         | 40-60   | <.001                                                                                                                                        | 0.998        | <b>0.026</b> | 0.002 | <.001        | <.001   | <.001   | <.001   | <.001   | Age*Genotype       |                      |        |       |
|         | 60-80   | <.001                                                                                                                                        | 0.989        | >.999        | >.999 | <b>0.992</b> | 0.996   | 0.992   | 0.992   | 0.992   | df                 | F                    | p      |       |
|         | 80-100  | <.001                                                                                                                                        | 0.217        | >.999        | >.999 | >.999        | >.999   | >.999   | >.999   | >.999   | 1 / 192            | 5.483E-20            | >.999  |       |
|         | 100-120 | <.001                                                                                                                                        | 0.117        | >.999        | >.999 | >.999        | >.999   | >.999   | >.999   | >.999   | Intensity*Genotype |                      |        |       |
|         | 120-140 | <.001                                                                                                                                        | 0.139        | >.999        | >.999 | >.999        | >.999   | >.999   | >.999   | >.999   | df                 | F                    | p      |       |
|         | 140-160 | <.001                                                                                                                                        | 0.117        | >.999        | >.999 | >.999        | >.999   | >.999   | >.999   | >.999   | 11 / 192           | 12.500               | <.001  |       |
| 160-180 | <.001   | 0.117                                                                                                                                        | >.999        | >.999        | >.999 | >.999        | >.999   | >.999   | >.999   |         |                    |                      |        |       |

| Fig S3O   | Frequency of mPSCs in developmentally generated and 1-week-old adult-born DGCs of WT and GSK-3 $\beta$ -OE mice |        | INTER-SUBJECT EFFECT |         |        |
|-----------|-----------------------------------------------------------------------------------------------------------------|--------|----------------------|---------|--------|
|           | Two-way ANOVA                                                                                                   |        | Cell age             |         |        |
|           | GSK-3-OE                                                                                                        |        | df                   | F       | p      |
|           |                                                                                                                 |        | 1 / 25               | 4.438   | 0.0453 |
| WT        | Embryonic                                                                                                       | Adult  | Genotype             |         |        |
| Embryonic | 0.5134                                                                                                          | --     | df                   | F       | p      |
| Adult     | --                                                                                                              | 0.2494 | 1 / 25               | 3.731   | 0.0648 |
|           |                                                                                                                 |        | Age*Genotype         |         |        |
|           |                                                                                                                 |        | df                   | F       | p      |
|           |                                                                                                                 |        | 1 / 25               | 0.05288 | 0.82   |

| Fig S3P   | Amplitude of mPSCs in developmentally generated and 1-week-old adult-born DGCs of WT and GSK-3 $\beta$ -OE mice |         | INTER-SUBJECT EFFECT |       |        |
|-----------|-----------------------------------------------------------------------------------------------------------------|---------|----------------------|-------|--------|
|           | Two-way ANOVA                                                                                                   |         | Cell age             |       |        |
|           | GSK-3-OE                                                                                                        |         | df                   | F     | p      |
|           |                                                                                                                 |         | 1 / 23               | 20.81 | <.001  |
| WT        | Embryonic                                                                                                       | Adult   | Genotype             |       |        |
| Embryonic | 0.0946                                                                                                          | --      | df                   | F     | p      |
| Adult     | --                                                                                                              | >0.9999 | 1 / 23               | 3.739 | 0.0655 |
|           |                                                                                                                 |         | Age*Genotype         |       |        |
|           |                                                                                                                 |         | df                   | F     | p      |
|           |                                                                                                                 |         | 1 / 23               | 0.88  | 0.3579 |

| Fig S3Q   | Slope of mPSCs in developmentally generated and 1-week-old adult-born DGCs of WT and GSK-3 $\beta$ -OE mice |         | INTER-SUBJECT EFFECT |       |        |
|-----------|-------------------------------------------------------------------------------------------------------------|---------|----------------------|-------|--------|
|           | Two-way ANOVA                                                                                               |         | Cell age             |       |        |
|           | GSK-3-OE                                                                                                    |         | df                   | F     | p      |
|           |                                                                                                             |         | 1 / 23               | 20.08 | <.001  |
| WT        | Embryonic                                                                                                   | Adult   | Genotype             |       |        |
| Embryonic | 0.0722                                                                                                      | --      | df                   | F     | p      |
| Adult     | --                                                                                                          | >0.9999 | 1 / 23               | 2.179 | 0.1535 |
|           |                                                                                                             |         | Age*Genotype         |       |        |
|           |                                                                                                             |         | df                   | F     | p      |
|           |                                                                                                             |         | 1 / 23               | 2.478 | 0.1291 |

**SUPPLEMENTARY FIGURE S4:**

| Fig S4A                                | Sholl's analysis of 1-week-old adult-born DGCs |       |                      |        |       |
|----------------------------------------|------------------------------------------------|-------|----------------------|--------|-------|
|                                        | REPEATED MEASURES ANOVA TEST                   |       |                      |        |       |
|                                        | WT vs GSK-3-OE                                 |       |                      |        |       |
| Distance to the soma ( $\mu\text{m}$ ) | $\mu\text{m}$                                  | p     | INTER-SUBJECT EFFECT |        |       |
|                                        | 0                                              | >.999 |                      |        |       |
|                                        | 10                                             | >.999 | Distance             |        |       |
|                                        | 20                                             | 0.062 | df                   | F      | p     |
|                                        | 30                                             | <.001 | 35 / 2160            | 88.070 | <.001 |
|                                        | 40                                             | <.001 |                      |        |       |
|                                        | 50                                             | <.001 | Genotype             |        |       |
|                                        | 60                                             | <.001 | df                   | F      | p     |
|                                        | 70                                             | >.999 | 1 / 2160             | 21.370 | <.001 |
|                                        | 80                                             | >.999 |                      |        |       |
|                                        | 90                                             | >.999 | Distance*Genotype    |        |       |
|                                        | 100                                            | >.999 | df                   | F      | p     |
|                                        | 110                                            | >.999 | 35 / 2160            | 3.068  | <.001 |
|                                        | 120                                            | >.999 |                      |        |       |
|                                        | 130                                            | >.999 |                      |        |       |
|                                        | 140                                            | >.999 |                      |        |       |
|                                        | 150                                            | >.999 |                      |        |       |
|                                        | 160                                            | >.999 |                      |        |       |
|                                        | 170                                            | >.999 |                      |        |       |
|                                        | 180                                            | >.999 |                      |        |       |
|                                        | 190                                            | >.999 |                      |        |       |
|                                        | 200                                            | >.999 |                      |        |       |
|                                        | 210                                            | >.999 |                      |        |       |
|                                        | 220                                            | >.999 |                      |        |       |
|                                        | 230                                            | >.999 |                      |        |       |
|                                        | 240                                            | >.999 |                      |        |       |
|                                        | 250                                            | >.999 |                      |        |       |
|                                        | 260                                            | >.999 |                      |        |       |
|                                        | 270                                            | >.999 |                      |        |       |
|                                        | 280                                            | >.999 |                      |        |       |
|                                        | 290                                            | >.999 |                      |        |       |
|                                        | 300                                            | >.999 |                      |        |       |
|                                        | 310                                            | >.999 |                      |        |       |
|                                        | 320                                            | >.999 |                      |        |       |
|                                        | 330                                            | >.999 |                      |        |       |
| 340                                    | >.999                                          |       |                      |        |       |
| 350                                    | >.999                                          |       |                      |        |       |

| Fig S4B        | Total dendritic length of 1-week-old adult-born DGCs |    |       |
|----------------|------------------------------------------------------|----|-------|
|                | Student t- Test                                      |    |       |
|                | t                                                    | df | p     |
| WT vs GSK-3-OE | 2.736                                                | 58 | 0.008 |

| Fig S4C                                | Sholl's analysis of 2-week-old adult-born DGCs |       |                      |         |       |
|----------------------------------------|------------------------------------------------|-------|----------------------|---------|-------|
|                                        | REPEATED MEASURES ANOVA TEST                   |       |                      |         |       |
|                                        | WT vs GSK-3-OE                                 |       |                      |         |       |
| Distance to the soma ( $\mu\text{m}$ ) | $\mu\text{m}$                                  | p     | INTER-SUBJECT EFFECT |         |       |
|                                        | 0                                              | >.999 |                      |         |       |
|                                        | 10                                             | >.999 | Distance             |         |       |
|                                        | 20                                             | 0.005 | df                   | F       | p     |
|                                        | 30                                             | 0.406 | 35 / 1044            | 110.400 | <.001 |
|                                        | 40                                             | <.001 |                      |         |       |
|                                        | 50                                             | <.001 | Genotype             |         |       |
|                                        | 60                                             | >.999 | df                   | F       | p     |
|                                        | 70                                             | 0.176 | 1 / 1044             | 0.005   | 0.944 |
|                                        | 80                                             | <.001 |                      |         |       |
|                                        | 90                                             | <.001 | Distance*Genotype    |         |       |
|                                        | 100                                            | 0.27  | df                   | F       | p     |
|                                        | 110                                            | >.999 | 35 / 1044            | 3.804   | <.001 |
|                                        | 120                                            | >.999 |                      |         |       |
|                                        | 130                                            | >.999 |                      |         |       |
|                                        | 140                                            | >.999 |                      |         |       |
|                                        | 150                                            | >.999 |                      |         |       |
|                                        | 160                                            | >.999 |                      |         |       |
|                                        | 170                                            | >.999 |                      |         |       |
|                                        | 180                                            | >.999 |                      |         |       |
|                                        | 190                                            | >.999 |                      |         |       |
|                                        | 200                                            | >.999 |                      |         |       |
|                                        | 210                                            | >.999 |                      |         |       |
|                                        | 220                                            | >.999 |                      |         |       |
|                                        | 230                                            | >.999 |                      |         |       |
|                                        | 240                                            | >.999 |                      |         |       |
|                                        | 250                                            | >.999 |                      |         |       |
|                                        | 260                                            | >.999 |                      |         |       |
|                                        | 270                                            | >.999 |                      |         |       |
|                                        | 280                                            | >.999 |                      |         |       |
|                                        | 290                                            | >.999 |                      |         |       |
|                                        | 300                                            | >.999 |                      |         |       |
|                                        | 310                                            | >.999 |                      |         |       |
|                                        | 320                                            | >.999 |                      |         |       |
|                                        | 330                                            | >.999 |                      |         |       |
| 340                                    | >.999                                          |       |                      |         |       |
| 350                                    | >.999                                          |       |                      |         |       |

| Fig S4D        | Total dendritic length of 2-week-old adult-born DGCs |       |
|----------------|------------------------------------------------------|-------|
|                | Mann Whitney test                                    |       |
|                | U                                                    | p     |
| WT vs GSK-3-OE | 422                                                  | 0.686 |

| Fig S4E                                | Sholl's analysis of 3-week-old adult-born DGCs |       |                      |        |       |
|----------------------------------------|------------------------------------------------|-------|----------------------|--------|-------|
|                                        | REPEATED MEASURES ANOVA TEST                   |       |                      |        |       |
|                                        | WT vs GSK-3-OE                                 |       |                      |        |       |
| Distance to the soma ( $\mu\text{m}$ ) | $\mu\text{m}$                                  | p     | INTER-SUBJECT EFFECT |        |       |
|                                        | 0                                              | >.999 |                      |        |       |
|                                        | 10                                             | >.999 | Distance             |        |       |
|                                        | 20                                             | >.999 | df                   | F      | p     |
|                                        | 30                                             | 0.692 | 35 / 1584            | 77.120 | <.001 |
|                                        | 40                                             | >.999 |                      |        |       |
|                                        | 50                                             | >.999 | Genotype             |        |       |
|                                        | 60                                             | >.999 | df                   | F      | p     |
|                                        | 70                                             | >.999 | 1 / 1584             | 3.697  | 0.055 |
|                                        | 80                                             | >.999 |                      |        |       |
|                                        | 90                                             | >.999 | Distance*Genotype    |        |       |
|                                        | 100                                            | >.999 | df                   | F      | p     |
|                                        | 110                                            | >.999 | 35 / 1584            | 2.031  | <.001 |
|                                        | 120                                            | >.999 |                      |        |       |
|                                        | 130                                            | >.999 |                      |        |       |
|                                        | 140                                            | >.999 |                      |        |       |
|                                        | 150                                            | >.999 |                      |        |       |
|                                        | 160                                            | 0.004 |                      |        |       |
|                                        | 170                                            | 0.008 |                      |        |       |
|                                        | 180                                            | 0.077 |                      |        |       |
|                                        | 190                                            | 0.086 |                      |        |       |
|                                        | 200                                            | >.999 |                      |        |       |
|                                        | 210                                            | >.999 |                      |        |       |
|                                        | 220                                            | >.999 |                      |        |       |
|                                        | 230                                            | >.999 |                      |        |       |
|                                        | 240                                            | >.999 |                      |        |       |
|                                        | 250                                            | >.999 |                      |        |       |
|                                        | 260                                            | >.999 |                      |        |       |
|                                        | 270                                            | >.999 |                      |        |       |
|                                        | 280                                            | >.999 |                      |        |       |
|                                        | 290                                            | >.999 |                      |        |       |
|                                        | 300                                            | >.999 |                      |        |       |
|                                        | 310                                            | >.999 |                      |        |       |
|                                        | 320                                            | >.999 |                      |        |       |
|                                        | 330                                            | >.999 |                      |        |       |
| 340                                    | >.999                                          |       |                      |        |       |
| 350                                    | >.999                                          |       |                      |        |       |

| Fig S4F        | Total dendritic length of 3-week-old adult-born DGCs |    |       |
|----------------|------------------------------------------------------|----|-------|
|                | Student t- Test                                      |    |       |
|                | t                                                    | df | p     |
| WT vs GSK-3-OE | 0.2788                                               | 43 | 0.782 |

| Fig S4G                                | Sholl's analysis of 4-week-old adult-born DGCs |       |                      |          |        |
|----------------------------------------|------------------------------------------------|-------|----------------------|----------|--------|
|                                        | REPEATED MEASURES ANOVA TEST                   |       |                      |          |        |
|                                        | WT vs GSK-3-OE                                 |       |                      |          |        |
| Distance to the soma ( $\mu\text{m}$ ) | $\mu\text{m}$                                  | p     | INTER-SUBJECT EFFECT |          |        |
|                                        | 0                                              | >.999 | Distance             |          |        |
|                                        | 10                                             | >.999 | df                   | F        | p      |
|                                        | 20                                             | >.999 | 35 / 1044            | 504.400  | <.001  |
|                                        | 30                                             | >.999 | Genotype             |          |        |
|                                        | 40                                             | >.999 | df                   | F        | p      |
|                                        | 50                                             | >.999 | 1 / 720              | 2.27E-14 | >0.999 |
|                                        | 60                                             | >.999 | Distance*Genotype    |          |        |
|                                        | 70                                             | >.999 | df                   | F        | p      |
|                                        | 80                                             | >.999 | 35 / 720             | 5.30E-15 | >0.999 |
|                                        | 90                                             | >.999 |                      |          |        |
|                                        | 100                                            | >.999 |                      |          |        |
|                                        | 110                                            | >.999 |                      |          |        |
|                                        | 120                                            | >.999 |                      |          |        |
|                                        | 130                                            | >.999 |                      |          |        |
|                                        | 140                                            | >.999 |                      |          |        |
|                                        | 150                                            | >.999 |                      |          |        |
|                                        | 160                                            | >.999 |                      |          |        |
|                                        | 170                                            | >.999 |                      |          |        |
|                                        | 180                                            | >.999 |                      |          |        |
|                                        | 190                                            | >.999 |                      |          |        |
|                                        | 200                                            | >.999 |                      |          |        |
|                                        | 210                                            | >.999 |                      |          |        |
|                                        | 220                                            | >.999 |                      |          |        |
|                                        | 230                                            | >.999 |                      |          |        |
|                                        | 240                                            | >.999 |                      |          |        |
|                                        | 250                                            | >.999 |                      |          |        |
|                                        | 260                                            | >.999 |                      |          |        |
|                                        | 270                                            | >.999 |                      |          |        |
|                                        | 280                                            | >.999 |                      |          |        |
|                                        | 290                                            | >.999 |                      |          |        |
|                                        | 300                                            | >.999 |                      |          |        |
|                                        | 310                                            | >.999 |                      |          |        |
|                                        | 320                                            | >.999 |                      |          |        |
|                                        | 330                                            | >.999 |                      |          |        |
| 340                                    | >.999                                          |       |                      |          |        |
| 350                                    | >.999                                          |       |                      |          |        |

| Fig S4H        | Total dendritic length of 4-week-old adult-born DGCs |    |     |
|----------------|------------------------------------------------------|----|-----|
|                | Student t- Test                                      |    |     |
|                | t                                                    | df | p   |
| WT vs GSK-3-OE | 0.8483                                               | 51 | 0.4 |



| Fig S4I                                | Sholl's analysis of 8-week-old adult-born DGCs |       |                      |        |       |
|----------------------------------------|------------------------------------------------|-------|----------------------|--------|-------|
|                                        | REPEATED MEASURES ANOVA TEST                   |       |                      |        |       |
|                                        | WT vs GSK-3-OE                                 |       |                      |        |       |
| Distance to the soma ( $\mu\text{m}$ ) | $\mu\text{m}$                                  | p     | INTER-SUBJECT EFFECT |        |       |
|                                        | 0                                              | >.999 |                      |        |       |
|                                        | 10                                             | >.999 | Distance             |        |       |
|                                        | 20                                             | >.999 | df                   | F      | p     |
|                                        | 30                                             | >.999 | 35 / 1044            | 74.680 | <.001 |
|                                        | 40                                             | >.999 |                      |        |       |
|                                        | 50                                             | >.999 | Genotype             |        |       |
|                                        | 60                                             | >.999 | df                   | F      | p     |
|                                        | 70                                             | 0.035 | 1 / 1044             | 30.940 | <.001 |
|                                        | 80                                             | <.001 |                      |        |       |
|                                        | 90                                             | <.001 | Distance*Genotype    |        |       |
|                                        | 100                                            | 0.003 | df                   | F      | p     |
|                                        | 110                                            | 0.419 | 35 / 1044            | 2.005  | <.001 |
|                                        | 120                                            | >.999 |                      |        |       |
|                                        | 130                                            | >.999 |                      |        |       |
|                                        | 140                                            | >.999 |                      |        |       |
|                                        | 150                                            | >.999 |                      |        |       |
|                                        | 160                                            | >.999 |                      |        |       |
|                                        | 170                                            | >.999 |                      |        |       |
|                                        | 180                                            | >.999 |                      |        |       |
|                                        | 190                                            | >.999 |                      |        |       |
|                                        | 200                                            | >.999 |                      |        |       |
|                                        | 210                                            | >.999 |                      |        |       |
|                                        | 220                                            | >.999 |                      |        |       |
|                                        | 230                                            | >.999 |                      |        |       |
|                                        | 240                                            | >.999 |                      |        |       |
|                                        | 250                                            | >.999 |                      |        |       |
|                                        | 260                                            | >.999 |                      |        |       |
|                                        | 270                                            | >.999 |                      |        |       |
|                                        | 280                                            | >.999 |                      |        |       |
|                                        | 290                                            | >.999 |                      |        |       |
|                                        | 300                                            | >.999 |                      |        |       |
|                                        | 310                                            | >.999 |                      |        |       |
|                                        | 320                                            | >.999 |                      |        |       |
|                                        | 330                                            | >.999 |                      |        |       |
| 340                                    | >.999                                          |       |                      |        |       |
| 350                                    | >.999                                          |       |                      |        |       |

| Fig S4J        | Total dendritic length of 8-week-old adult-born DGCs |    |       |
|----------------|------------------------------------------------------|----|-------|
|                | Student t- Test                                      |    |       |
|                | t                                                    | df | p     |
| WT vs GSK-3-OE | 5.068                                                | 57 | <.001 |



| Fig S5H        | Lectin <sup>+</sup> fluorescence intensity in PNN of PV <sup>+</sup> interneurons located at the Hilus |    |       |
|----------------|--------------------------------------------------------------------------------------------------------|----|-------|
|                | Student t- Test                                                                                        |    |       |
|                | t                                                                                                      | df | p     |
| WT vs GSK-3-OE | 2.066                                                                                                  | 50 | 0.044 |

| Fig S5I | Classification of PV <sup>+</sup> interneurons according to the intensity of Lectin <sup>+</sup> PNNs in the Hilus |       |       |       |        |         |         |         |         |          |                      |          |       |
|---------|--------------------------------------------------------------------------------------------------------------------|-------|-------|-------|--------|---------|---------|---------|---------|----------|----------------------|----------|-------|
|         | ANOVA                                                                                                              |       |       |       |        |         |         |         |         |          | INTER-SUBJECT EFFECT |          |       |
|         | GSK-3-OE                                                                                                           |       |       |       |        |         |         |         |         |          | Intensity            |          |       |
|         | 0-20                                                                                                               | 20-40 | 40-60 | 60-80 | 80-100 | 100-120 | 120-140 | 140-160 | 160-180 | df       | F                    | p        |       |
| WT      | 0-20                                                                                                               | 0.281 | 0.981 | 0.292 | 0.7    | 0.068   | 0.095   | 0.119   | 0.036   | 11 / 192 | 14.200               | <.001    |       |
|         | 20-40                                                                                                              | 0.211 | 0.96  | 0.377 | 0.788  | 0.098   | 0.136   | 0.166   | 0.055   |          |                      |          |       |
|         | 40-60                                                                                                              | 0.816 | >.999 | 0.039 | 0.189  | 0.005   | 0.008   | 0.011   | 0.002   |          |                      |          |       |
|         | 60-80                                                                                                              | <.001 | 0.041 | >.999 | >.999  | 0.994   | 0.998   | >.999   | 0.977   | >.999    |                      |          |       |
|         | 80-100                                                                                                             | <.001 | <.001 | >.999 | >.999  | >.999   | >.999   | >.999   | >.999   | >.999    | 1 / 192              | 2.20E-18 | >.999 |
|         | 100-120                                                                                                            | <.001 | <.001 | >.999 | >.999  | >.999   | >.999   | >.999   | >.999   | >.999    |                      |          |       |
|         | 120-140                                                                                                            | <.001 | 0.002 | >.999 | >.999  | >.999   | >.999   | >.999   | >.999   | >.999    |                      |          |       |
|         | 140-160                                                                                                            | <.001 | <.001 | >.999 | >.999  | >.999   | >.999   | >.999   | >.999   | >.999    |                      |          |       |
|         | 160-180                                                                                                            | <.001 | <.001 | >.999 | >.999  | >.999   | >.999   | >.999   | >.999   | >.999    | 11 / 192             | 2.571    | 0.005 |

| Fig S5J        | Aggrecan <sup>+</sup> fluorescence intensity in PNN of PV <sup>+</sup> interneurons located at the GCL |    |       |
|----------------|--------------------------------------------------------------------------------------------------------|----|-------|
|                | Student t- Test                                                                                        |    |       |
|                | t                                                                                                      | df | p     |
| WT vs GSK-3-OE | 5.805                                                                                                  | 48 | <.001 |

| Fig S5K | Classification of PV <sup>+</sup> interneurons according to the intensity of Aggrecan <sup>+</sup> PNNs in the GCL |       |       |       |        |         |         |         |         |          |                      |       |
|---------|--------------------------------------------------------------------------------------------------------------------|-------|-------|-------|--------|---------|---------|---------|---------|----------|----------------------|-------|
|         | ANOVA                                                                                                              |       |       |       |        |         |         |         |         |          | INTER-SUBJECT EFFECT |       |
|         | GSK-3-OE                                                                                                           |       |       |       |        |         |         |         |         |          | Intensity            |       |
|         | 0-20                                                                                                               | 20-40 | 40-60 | 60-80 | 80-100 | 100-120 | 120-140 | 140-160 | 160-180 | df       | F                    | p     |
| WT      | 0-20                                                                                                               | <.001 | >.999 | 0.598 | 0.154  | 0.096   | 0.096   | 0.096   | 0.096   | 11 / 192 | 24.110               | <.001 |
|         | 20-40                                                                                                              | <.001 | 0.409 | <.001 | <.001  | <.001   | <.001   | <.001   | <.001   |          |                      |       |
|         | 40-60                                                                                                              | <.001 | 0.923 | 0.011 | <.001  | <.001   | <.001   | <.001   | <.001   |          |                      |       |
|         | 60-80                                                                                                              | <.001 | 0.998 | >.999 | >.999  | >.999   | >.999   | >.999   | >.999   |          |                      |       |
|         | 80-100                                                                                                             | <.001 | 0.491 | >.999 | >.999  | >.999   | >.999   | >.999   | >.999   | 1 / 192  | 2.10E-19             | >.999 |
|         | 100-120                                                                                                            | <.001 | 0.347 | >.999 | >.999  | >.999   | >.999   | >.999   | >.999   |          |                      |       |
|         | 120-140                                                                                                            | <.001 | 0.347 | >.999 | >.999  | >.999   | >.999   | >.999   | >.999   |          |                      |       |
|         | 140-160                                                                                                            | <.001 | 0.347 | >.999 | >.999  | >.999   | >.999   | >.999   | >.999   |          |                      |       |
|         | 160-180                                                                                                            | <.001 | 0.347 | >.999 | >.999  | >.999   | >.999   | >.999   | >.999   | 11 / 192 | 8.874                | 0.031 |

| Fig S5L        | Aggrecan <sup>+</sup> fluorescence intensity in PNN of PV <sup>+</sup> interneurons located at the SGZ |       |
|----------------|--------------------------------------------------------------------------------------------------------|-------|
|                | Mann Whitney test                                                                                      |       |
|                | U                                                                                                      | p     |
| WT vs GSK-3-OE | 182                                                                                                    | <.001 |

| Fig S5M | Classification of PV <sup>+</sup> interneurons according to the intensity of Aggrecan <sup>+</sup> PNNs in the SGZ |       |       |       |        |         |         |         |         |          |                      |       |
|---------|--------------------------------------------------------------------------------------------------------------------|-------|-------|-------|--------|---------|---------|---------|---------|----------|----------------------|-------|
|         | ANOVA                                                                                                              |       |       |       |        |         |         |         |         |          | INTER-SUBJECT EFFECT |       |
|         | GSK-3-OE                                                                                                           |       |       |       |        |         |         |         |         |          | Intensity            |       |
|         | 0-20                                                                                                               | 20-40 | 40-60 | 60-80 | 80-100 | 100-120 | 120-140 | 140-160 | 160-180 | df       | F                    | p     |
| WT      | 0-20                                                                                                               | <.001 | >.999 | 0.3   | 0.14   | 0.044   | 0.044   | 0.044   | 0.044   | 11 / 192 | 26.750               | <.001 |
|         | 20-40                                                                                                              | 0.028 | <.001 | <.001 | <.001  | <.001   | <.001   | <.001   | <.001   |          |                      |       |
|         | 40-60                                                                                                              | <.001 | >.999 | 0.461 | 0.247  | 0.089   | 0.089   | 0.089   | 0.089   |          |                      |       |
|         | 60-80                                                                                                              | <.001 | 0.743 | >.999 | >.999  | >.999   | >.999   | >.999   | >.999   |          |                      |       |
|         | 80-100                                                                                                             | <.001 | 0.379 | >.999 | >.999  | >.999   | >.999   | >.999   | >.999   | 1 / 192  | 8.27E-20             | >.999 |
|         | 100-120                                                                                                            | <.001 | 0.272 | >.999 | >.999  | >.999   | >.999   | >.999   | >.999   |          |                      |       |
|         | 120-140                                                                                                            | <.001 | 0.272 | >.999 | >.999  | >.999   | >.999   | >.999   | >.999   |          |                      |       |
|         | 140-160                                                                                                            | <.001 | 0.272 | >.999 | >.999  | >.999   | >.999   | >.999   | >.999   |          |                      |       |
|         | 160-180                                                                                                            | <.001 | 0.272 | >.999 | >.999  | >.999   | >.999   | >.999   | >.999   | 11 / 192 | 8.704                | <.001 |

|                |                                                                                                          |       |
|----------------|----------------------------------------------------------------------------------------------------------|-------|
| Fig S5N        | AggreCAN <sup>+</sup> fluorescence intensity in PNN of PV <sup>+</sup> interneurons located at the Hilus |       |
|                | Mann Whitney test                                                                                        |       |
|                | U                                                                                                        | p     |
| WT vs GSK-3-OE | 130                                                                                                      | 0.003 |

|         |                                                                                                                      |       |              |              |                 |                 |                 |                 |                 |          |                      |          |       |
|---------|----------------------------------------------------------------------------------------------------------------------|-------|--------------|--------------|-----------------|-----------------|-----------------|-----------------|-----------------|----------|----------------------|----------|-------|
| Fig S5O | Classification of PV <sup>+</sup> interneurons according to the intensity of AggreCAN <sup>+</sup> PNNs in the Hilus |       |              |              |                 |                 |                 |                 |                 |          |                      |          |       |
|         | ANOVA                                                                                                                |       |              |              |                 |                 |                 |                 |                 |          | INTER-SUBJECT EFFECT |          |       |
|         | GSK-3-OE                                                                                                             |       |              |              |                 |                 |                 |                 |                 |          | Intensity            |          |       |
|         |                                                                                                                      | 0-20  | 20-40        | 40-60        | 60-80           | 80-100          | 100-120         | 120-140         | 140-160         | 160-180  | df                   | F        | p     |
| WT      | 0-20                                                                                                                 | <.001 | <.001        | <.001        | <.001           | <.001           | <.001           | <.001           | <.001           | <.001    | 11 / 192             | 47.470   | <.001 |
|         | 20-40                                                                                                                | <.001 | <b>0.997</b> | 0.376        | 0.519           | 0.221           | 0.519           | 0.221           | 0.221           | 0.221    |                      |          |       |
|         | 40-60                                                                                                                | <.001 | 0.276        | <b>0.004</b> | 0.009           | 0.001           | 0.009           | 0.001           | 0.001           | 0.001    | Genotype             |          |       |
|         | 60-80                                                                                                                | <.001 | >.999        | >.999        | <b>&gt;.999</b> | >.999           | >.999           | >.999           | >.999           | >.999    | df                   | F        | p     |
|         | 80-100                                                                                                               | <.001 | >.999        | >.999        | >.999           | <b>&gt;.999</b> | >.999           | >.999           | >.999           | >.999    | 1 / 192              | 1.67E-20 | >.999 |
|         | 100-120                                                                                                              | <.001 | 0.996        | >.999        | >.999           | >.999           | <b>&gt;.999</b> | >.999           | >.999           | >.999    |                      |          |       |
|         | 120-140                                                                                                              | <.001 | 0.996        | >.999        | >.999           | >.999           | >.999           | <b>&gt;.999</b> | >.999           | >.999    | Intensity*Genotype   |          |       |
|         | 140-160                                                                                                              | <.001 | 0.996        | >.999        | >.999           | >.999           | >.999           | >.999           | <b>&gt;.999</b> | >.999    | df                   | F        | p     |
| 160-180 | <.001                                                                                                                | 0.996 | >.999        | >.999        | >.999           | >.999           | >.999           | >.999           | <b>&gt;.999</b> | 11 / 192 | 5.497                | <.001    |       |
